# Supplementary material for: In Vivo Response of Growth Plate to Biodegradable Mg-Ca-Zn Alloys Depending on the Surface Modification
Source: MDPI journal article supplement (doi:10.3390/ijms20153761), 2019-08-01

# *Institutional Animal Care and Use Protocol Approval*

|               |                                                                           |        |                   |                     |  |
|---------------|---------------------------------------------------------------------------|--------|-------------------|---------------------|--|
| Name of Study | Physéal Response to Biodegradable Mg-Ca-Zn Alloy Pins in Immature Rabbits |        |                   |                     |  |
| IACUC No.     | 15-0140                                                                   |        | Study             | Aug . 03 . 2015 . ~ |  |
| Study No.     | 35 - 2015 - 009 - 6                                                       | Period | Aug . 02 . 2016 . |                     |  |

## <Evaluation Criteria and Discussion Results>

|   |                                                                                                                                                                  |          |                                                                                                                                                                            |
|---|------------------------------------------------------------------------------------------------------------------------------------------------------------------|----------|----------------------------------------------------------------------------------------------------------------------------------------------------------------------------|
| 1 | The rationale and purpose of the proposed use of animals<br><input checked="" type="checkbox"/> appropriate <input type="checkbox"/> inappropriate               | 7        | Unusual housing and husbandry requirements<br><input type="checkbox"/> necessary <input checked="" type="checkbox"/> unnecessary                                           |
| 2 | Justification of species and number of animals requested<br><input checked="" type="checkbox"/> appropriate <input type="checkbox"/> inappropriate               | 8        | Appropriate sedation, analgesia, and anesthesia<br><input checked="" type="checkbox"/> appropriate <input type="checkbox"/> inappropriate                                  |
| 3 | Unnecessary duplication of tests or experiments<br><input checked="" type="checkbox"/> appropriate <input type="checkbox"/> inappropriate                        | 9        | Method of euthanasia or disposition of animal<br><input checked="" type="checkbox"/> appropriate <input type="checkbox"/> inappropriate                                    |
| 4 | Availability or appropriateness of the use of less-invasive procedures<br><input checked="" type="checkbox"/> appropriate <input type="checkbox"/> inappropriate | 10       | Criteria and process for timely intervention, removal, or euthanasia if required<br><input checked="" type="checkbox"/> appropriate <input type="checkbox"/> inappropriate |
| 5 | Adequacy of training and experience of personnel<br><input checked="" type="checkbox"/> appropriate <input type="checkbox"/> inappropriate                       | 11       | Safety of working environment for personnel<br><input checked="" type="checkbox"/> appropriate <input type="checkbox"/> inappropriate                                      |
| 6 | Conduct of multiple major surgical procedures<br><input checked="" type="checkbox"/> appropriate <input type="checkbox"/> inappropriate                          | Remarks: |                                                                                                                                                                            |

Date of Submission

July. 03, 2015

Principle Investigator

TAE JOON CHO

Date of Approval

July. 22, 2015

IACUC Chair

Kook Hyun Lee

(sign)  


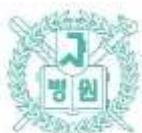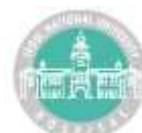

Supplement: s1 [file s1]
